# Supplementary material for: The effects of exosomes derived from trabecular meshwork cells on Schlemm’s canal endothelial cells
Source: PubMed Central journal article supplement (PMC8578291; doi:10.1038/s41598-021-01450-9), 2021-11-09

## **Title page**

**Title:** The effects of exosomes derived from trabecular meshwork cells on Schlemm's canal endothelial cells

**Authors' names:** Eri Takahashi\*<sup>1</sup>, Junji Saruwatari<sup>2</sup>, Tomokazu Fujimoto<sup>1</sup>, Yuki Tanoue<sup>3</sup>, Takaichi Fukuda<sup>4</sup>, Toshihiro Inoue<sup>1</sup>

1 Department of Ophthalmology, Faculty of Life Sciences, Kumamoto University, Kumamoto, Japan; 2 Department of Pharmacology and Therapeutics, Graduate School of Pharmaceutical Sciences, Kumamoto University; 3 International Research Center for Medical Sciences, Faculty of Life Sciences, Kumamoto University, Kumamoto, Japan; 4 Department of Anatomy and Neurobiology, Faculty of Life Sciences, Kumamoto University.

**Corresponding author:** Eri Takahashi, Department of Ophthalmology, Faculty of Life Sciences, Kumamoto University, 1-1-1 Honjo, Chuo-ku, Kumamoto 860-8556, Japan.

Telephone: +81 96 373 5247; Fax: +81 96 373 5249.

**E-mail address:** [eritakahashi@kumamoto-u.ac.jp](mailto:eritakahashi@kumamoto-u.ac.jp)

**Supplementary Figure 1: Full-length blots for Figure 1B**

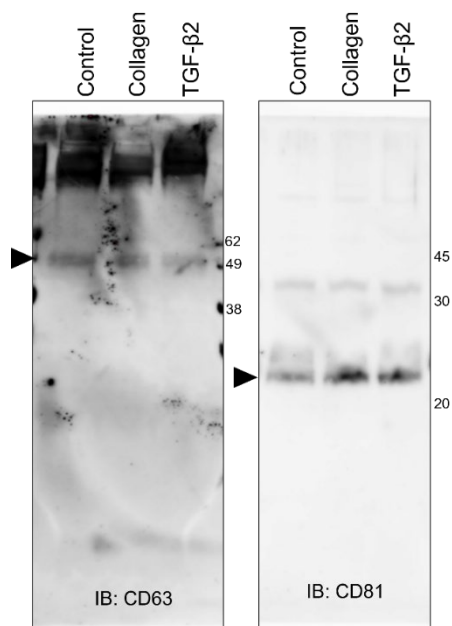

## Supplementary Figure 2

A constructed network of 46 miRNAs and 1440 mRNAs in TGF- $\beta$ 2-stimulated cultures.

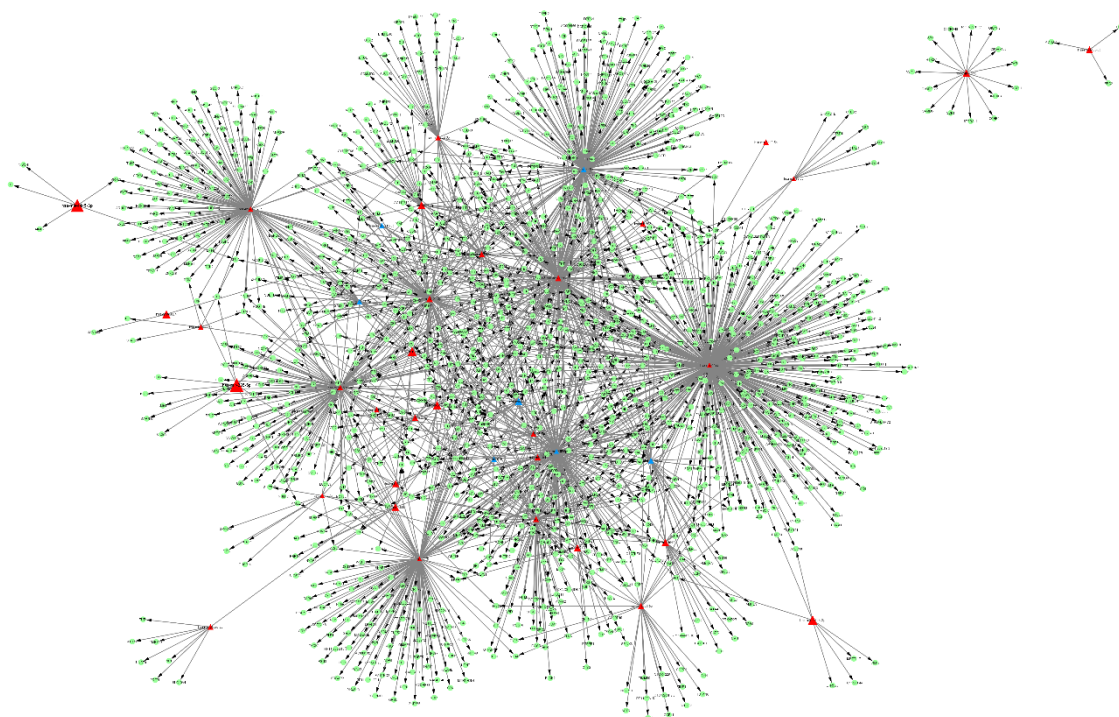

# Supplementary Table S1: Genes associated with enriched GO and KEGG terms in the TGF- $\beta$ 2-treated group compared to the control group.

| Category | ID         | Term                                                                 | LOG10(P-value) | Genes                                                                                                                                                                                                                                                                                                                                                                                                                                                                                                                                                                                                                                                                                                                                                                                                                                                                                                                                                                                                                                                                                                                                                                                                                                                                                                                                                                                                                                                                                                                                                                                                                                                                                                                                                                                                                                                                                                                                                                                                                                                                                                                                                                                                                                                                                                                                                                                                                                                                                                                                                                                                                                                                                                                                                                                                                                                                                                                                                                                                                                                                                                                                                                                                                                                                                                                                                                                                                                                                                                                                                                                                                                                                                                                                                                                                                                                                                                                                                                                                                                                                                                                                                                                                                                                                                                                                                                                                                                                                                                                                                                                                                                                                                                                                                                                                                                                                                                                                                                                                                                                                                                                                                                                                                                                                                                                                                                                                                                                                                                                                                                                                                                                                                                                                                                                                                                                                                                                                                                                                                                                                                                                                                                                                                                                                                                                                                                                                                                                                                                                                                                                                                                                                                                                                                                                                                                                                                                                                                                                                                                                                                                                                                                                                                                                                                |
|----------|------------|----------------------------------------------------------------------|----------------|--------------------------------------------------------------------------------------------------------------------------------------------------------------------------------------------------------------------------------------------------------------------------------------------------------------------------------------------------------------------------------------------------------------------------------------------------------------------------------------------------------------------------------------------------------------------------------------------------------------------------------------------------------------------------------------------------------------------------------------------------------------------------------------------------------------------------------------------------------------------------------------------------------------------------------------------------------------------------------------------------------------------------------------------------------------------------------------------------------------------------------------------------------------------------------------------------------------------------------------------------------------------------------------------------------------------------------------------------------------------------------------------------------------------------------------------------------------------------------------------------------------------------------------------------------------------------------------------------------------------------------------------------------------------------------------------------------------------------------------------------------------------------------------------------------------------------------------------------------------------------------------------------------------------------------------------------------------------------------------------------------------------------------------------------------------------------------------------------------------------------------------------------------------------------------------------------------------------------------------------------------------------------------------------------------------------------------------------------------------------------------------------------------------------------------------------------------------------------------------------------------------------------------------------------------------------------------------------------------------------------------------------------------------------------------------------------------------------------------------------------------------------------------------------------------------------------------------------------------------------------------------------------------------------------------------------------------------------------------------------------------------------------------------------------------------------------------------------------------------------------------------------------------------------------------------------------------------------------------------------------------------------------------------------------------------------------------------------------------------------------------------------------------------------------------------------------------------------------------------------------------------------------------------------------------------------------------------------------------------------------------------------------------------------------------------------------------------------------------------------------------------------------------------------------------------------------------------------------------------------------------------------------------------------------------------------------------------------------------------------------------------------------------------------------------------------------------------------------------------------------------------------------------------------------------------------------------------------------------------------------------------------------------------------------------------------------------------------------------------------------------------------------------------------------------------------------------------------------------------------------------------------------------------------------------------------------------------------------------------------------------------------------------------------------------------------------------------------------------------------------------------------------------------------------------------------------------------------------------------------------------------------------------------------------------------------------------------------------------------------------------------------------------------------------------------------------------------------------------------------------------------------------------------------------------------------------------------------------------------------------------------------------------------------------------------------------------------------------------------------------------------------------------------------------------------------------------------------------------------------------------------------------------------------------------------------------------------------------------------------------------------------------------------------------------------------------------------------------------------------------------------------------------------------------------------------------------------------------------------------------------------------------------------------------------------------------------------------------------------------------------------------------------------------------------------------------------------------------------------------------------------------------------------------------------------------------------------------------------------------------------------------------------------------------------------------------------------------------------------------------------------------------------------------------------------------------------------------------------------------------------------------------------------------------------------------------------------------------------------------------------------------------------------------------------------------------------------------------------------------------------------------------------------------------------------------------------------------------------------------------------------------------------------------------------------------------------------------------------------------------------------------------------------------------------------------------------------------------------------------------------------------------------------------------------------------------------------------------------------------------------------------------------------|
| GOTERM   | GO:0034097 | Response to cytokine                                                 | 5.91           | TUND, AVPR2, PDX1, OSMR, DDOST, PML, RELB, GNAO1, MAPK8, TRMP1, PGGT1B, RARA, TMDP1, JUNB, IL6R, BCL2L1                                                                                                                                                                                                                                                                                                                                                                                                                                                                                                                                                                                                                                                                                                                                                                                                                                                                                                                                                                                                                                                                                                                                                                                                                                                                                                                                                                                                                                                                                                                                                                                                                                                                                                                                                                                                                                                                                                                                                                                                                                                                                                                                                                                                                                                                                                                                                                                                                                                                                                                                                                                                                                                                                                                                                                                                                                                                                                                                                                                                                                                                                                                                                                                                                                                                                                                                                                                                                                                                                                                                                                                                                                                                                                                                                                                                                                                                                                                                                                                                                                                                                                                                                                                                                                                                                                                                                                                                                                                                                                                                                                                                                                                                                                                                                                                                                                                                                                                                                                                                                                                                                                                                                                                                                                                                                                                                                                                                                                                                                                                                                                                                                                                                                                                                                                                                                                                                                                                                                                                                                                                                                                                                                                                                                                                                                                                                                                                                                                                                                                                                                                                                                                                                                                                                                                                                                                                                                                                                                                                                                                                                                                                                                                              |
| GOTERM   | GO:0045944 | Positive regulation of transcription from RNA polymerase II promoter | 3.69           | BACH1, ELK1, SOX2, CREB1, ZMIZ2, NFATC2IP, JUNB, CDKSRAP3, ACVRL1, BOMES, LMO1, CASK, BHLHA14, EBF4, SFRP2, TEL1, NOTCH1, GATA6, NRH2, RAI1, ZNF731, ZNF177, ZNF178, ZNF179, ZNF180, ZNF181, ZNF182, ZNF183, ZNF184, ZNF185, ZNF186, ZNF187, ZNF188, ZNF189, ZNF190, ZNF191, ZNF192, ZNF193, ZNF194, ZNF195, ZNF196, ZNF197, ZNF198, ZNF199, ZNF200, ZNF201, ZNF202, ZNF203, ZNF204, ZNF205, ZNF206, ZNF207, ZNF208, ZNF209, ZNF210, ZNF211, ZNF212, ZNF213, ZNF214, ZNF215, ZNF216, ZNF217, ZNF218, ZNF219, ZNF220, ZNF221, ZNF222, ZNF223, ZNF224, ZNF225, ZNF226, ZNF227, ZNF228, ZNF229, ZNF230, ZNF231, ZNF232, ZNF233, ZNF234, ZNF235, ZNF236, ZNF237, ZNF238, ZNF239, ZNF240, ZNF241, ZNF242, ZNF243, ZNF244, ZNF245, ZNF246, ZNF247, ZNF248, ZNF249, ZNF250, ZNF251, ZNF252, ZNF253, ZNF254, ZNF255, ZNF256, ZNF257, ZNF258, ZNF259, ZNF260, ZNF261, ZNF262, ZNF263, ZNF264, ZNF265, ZNF266, ZNF267, ZNF268, ZNF269, ZNF270, ZNF271, ZNF272, ZNF273, ZNF274, ZNF275, ZNF276, ZNF277, ZNF278, ZNF279, ZNF280, ZNF281, ZNF282, ZNF283, ZNF284, ZNF285, ZNF286, ZNF287, ZNF288, ZNF289, ZNF290, ZNF291, ZNF292, ZNF293, ZNF294, ZNF295, ZNF296, ZNF297, ZNF298, ZNF299, ZNF300, ZNF301, ZNF302, ZNF303, ZNF304, ZNF305, ZNF306, ZNF307, ZNF308, ZNF309, ZNF310, ZNF311, ZNF312, ZNF313, ZNF314, ZNF315, ZNF316, ZNF317, ZNF318, ZNF319, ZNF320, ZNF321, ZNF322, ZNF323, ZNF324, ZNF325, ZNF326, ZNF327, ZNF328, ZNF329, ZNF330, ZNF331, ZNF332, ZNF333, ZNF334, ZNF335, ZNF336, ZNF337, ZNF338, ZNF339, ZNF340, ZNF341, ZNF342, ZNF343, ZNF344, ZNF345, ZNF346, ZNF347, ZNF348, ZNF349, ZNF350, ZNF351, ZNF352, ZNF353, ZNF354, ZNF355, ZNF356, ZNF357, ZNF358, ZNF359, ZNF360, ZNF361, ZNF362, ZNF363, ZNF364, ZNF365, ZNF366, ZNF367, ZNF368, ZNF369, ZNF370, ZNF371, ZNF372, ZNF373, ZNF374, ZNF375, ZNF376, ZNF377, ZNF378, ZNF379, ZNF380, ZNF381, ZNF382, ZNF383, ZNF384, ZNF385, ZNF386, ZNF387, ZNF388, ZNF389, ZNF390, ZNF391, ZNF392, ZNF393, ZNF394, ZNF395, ZNF396, ZNF397, ZNF398, ZNF399, ZNF400, ZNF401, ZNF402, ZNF403, ZNF404, ZNF405, ZNF406, ZNF407, ZNF408, ZNF409, ZNF410, ZNF411, ZNF412, ZNF413, ZNF414, ZNF415, ZNF416, ZNF417, ZNF418, ZNF419, ZNF420, ZNF421, ZNF422, ZNF423, ZNF424, ZNF425, ZNF426, ZNF427, ZNF428, ZNF429, ZNF430, ZNF431, ZNF432, ZNF433, ZNF434, ZNF435, ZNF436, ZNF437, ZNF438, ZNF439, ZNF440, ZNF441, ZNF442, ZNF443, ZNF444, ZNF445, ZNF446, ZNF447, ZNF448, ZNF449, ZNF450, ZNF451, ZNF452, ZNF453, ZNF454, ZNF455, ZNF456, ZNF457, ZNF458, ZNF459, ZNF460, ZNF461, ZNF462, ZNF463, ZNF464, ZNF465, ZNF466, ZNF467, ZNF468, ZNF469, ZNF470, ZNF471, ZNF472, ZNF473, ZNF474, ZNF475, ZNF476, ZNF477, ZNF478, ZNF479, ZNF480, ZNF481, ZNF482, ZNF483, ZNF484, ZNF485, ZNF486, ZNF487, ZNF488, ZNF489, ZNF490, ZNF491, ZNF492, ZNF493, ZNF494, ZNF495, ZNF496, ZNF497, ZNF498, ZNF499, ZNF500, ZNF501, ZNF502, ZNF503, ZNF504, ZNF505, ZNF506, ZNF507, ZNF508, ZNF509, ZNF510, ZNF511, ZNF512, ZNF513, ZNF514, ZNF515, ZNF516, ZNF517, ZNF518, ZNF519, ZNF520, ZNF521, ZNF522, ZNF523, ZNF524, ZNF525, ZNF526, ZNF527, ZNF528, ZNF529, ZNF530, ZNF531, ZNF532, ZNF533, ZNF534, ZNF535, ZNF536, ZNF537, ZNF538, ZNF539, ZNF540, ZNF541, ZNF542, ZNF543, ZNF544, ZNF545, ZNF546, ZNF547, ZNF548, ZNF549, ZNF550, ZNF551, ZNF552, ZNF553, ZNF554, ZNF555, ZNF556, ZNF557, ZNF558, ZNF559, ZNF560, ZNF561, ZNF562, ZNF563, ZNF564, ZNF565, ZNF566, ZNF567, ZNF568, ZNF569, ZNF570, ZNF571, ZNF572, ZNF573, ZNF574, ZNF575, ZNF576, ZNF577, ZNF578, ZNF579, ZNF580, ZNF581, ZNF582, ZNF583, ZNF584, ZNF585, ZNF586, ZNF587, ZNF588, ZNF589, ZNF590, ZNF591, ZNF592, ZNF593, ZNF594, ZNF595, ZNF596, ZNF597, ZNF598, ZNF599, ZNF600, ZNF601, ZNF602, ZNF603, ZNF604, ZNF605, ZNF606, ZNF607, ZNF608, ZNF609, ZNF610, ZNF611, ZNF612, ZNF613, ZNF614, ZNF615, ZNF616, ZNF617, ZNF618, ZNF619, ZNF620, ZNF621, ZNF622, ZNF623, ZNF624, ZNF625, ZNF626, ZNF627, ZNF628, ZNF629, ZNF630, ZNF631, ZNF632, ZNF633, ZNF634, ZNF635, ZNF636, ZNF637, ZNF638, ZNF639, ZNF640, ZNF641, ZNF642, ZNF643, ZNF644, ZNF645, ZNF646, ZNF647, ZNF648, ZNF649, ZNF650, ZNF651, ZNF652, ZNF653, ZNF654, ZNF655, ZNF656, ZNF657, ZNF658, ZNF659, ZNF660, ZNF661, ZNF662, ZNF663, ZNF664, ZNF665, ZNF666, ZNF667, ZNF668, ZNF669, ZNF670, ZNF671, ZNF672, ZNF673, ZNF674, ZNF675, ZNF676, ZNF677, ZNF678, ZNF679, ZNF680, ZNF681, ZNF682, ZNF683, ZNF684, ZNF685, ZNF686, ZNF687, ZNF688, ZNF689, ZNF690, ZNF691, ZNF692, ZNF693, ZNF694, ZNF695, ZNF696, ZNF697, ZNF698, ZNF699, ZNF700, ZNF701, ZNF702, ZNF703, ZNF704, ZNF705, ZNF706, ZNF707, ZNF708, ZNF709, ZNF710, ZNF711, ZNF712, ZNF713, ZNF714, ZNF715, ZNF716, ZNF717, ZNF718, ZNF719, ZNF720, ZNF721, ZNF722, ZNF723, ZNF724, ZNF725, ZNF726, ZNF727, ZNF728, ZNF729, ZNF730, ZNF731, ZNF732, ZNF733, ZNF734, ZNF735, ZNF736, ZNF737, ZNF738, ZNF739, ZNF740, ZNF741, ZNF742, ZNF743, ZNF744, ZNF745, ZNF746, ZNF747, ZNF748, ZNF749, ZNF750, ZNF751, ZNF752, ZNF753, ZNF754, ZNF755, ZNF756, ZNF757, ZNF758, ZNF759, ZNF760, ZNF761, ZNF762, ZNF763, ZNF764, ZNF765, ZNF766, ZNF767, ZNF768, ZNF769, ZNF770, ZNF771, ZNF772, ZNF773, ZNF774, ZNF775, ZNF776, ZNF777, ZNF778, ZNF779, ZNF780, ZNF781, ZNF782, ZNF783, ZNF784, ZNF785, ZNF786, ZNF787, ZNF788, ZNF789, ZNF790, ZNF791, ZNF792, ZNF793, ZNF794, ZNF795, ZNF796, ZNF797, ZNF798, ZNF799, ZNF800, ZNF801, ZNF802, ZNF803, ZNF804, ZNF805, ZNF806, ZNF807, ZNF808, ZNF809, ZNF810, ZNF811, ZNF812, ZNF813, ZNF814, ZNF815, ZNF816, ZNF817, ZNF818, ZNF819, ZNF820, ZNF821, ZNF822, ZNF823, ZNF824, ZNF825, ZNF826, ZNF827, ZNF828, ZNF829, ZNF830, ZNF831, ZNF832, ZNF833, ZNF834, ZNF835, ZNF836, ZNF837, ZNF838, ZNF839, ZNF840, ZNF841, ZNF842, ZNF843, ZNF844, ZNF845, ZNF846, ZNF847, ZNF848, ZNF849, ZNF850, ZNF851, ZNF852, ZNF853, ZNF854, ZNF855, ZNF856, ZNF857, ZNF858, ZNF859, ZNF860, ZNF861, ZNF862, ZNF863, ZNF864, ZNF865, ZNF866, ZNF867, ZNF868, ZNF869, ZNF870, ZNF871, ZNF872, ZNF873, ZNF874, ZNF875, ZNF876, ZNF877, ZNF878, ZNF879, ZNF880, ZNF881, ZNF882, ZNF883, ZNF884, ZNF885, ZNF886, ZNF887, ZNF888, ZNF889, ZNF890, ZNF891, ZNF892, ZNF893, ZNF894, ZNF895, ZNF896, ZNF897, ZNF898, ZNF899, ZNF900, ZNF901, ZNF902, ZNF903, ZNF904, ZNF905, ZNF906, ZNF907, ZNF908, ZNF909, ZNF910, ZNF911, ZNF912, ZNF913, ZNF914, ZNF915, ZNF916, ZNF917, ZNF918, ZNF919, ZNF920, ZNF921, ZNF922, ZNF923, ZNF924, ZNF925, ZNF926, ZNF927, ZNF928, ZNF929, ZNF930, ZNF931, ZNF932, ZNF933, ZNF934, ZNF935, ZNF936, ZNF937, ZNF938, ZNF939, ZNF940, ZNF941, ZNF942, ZNF943, ZNF944, ZNF945, ZNF946, ZNF947, ZNF948, ZNF949, ZNF950, ZNF951, ZNF952, ZNF953, ZNF954, ZNF955, ZNF956, ZNF957, ZNF958, ZNF959, ZNF960, ZNF961, ZNF962, ZNF963, ZNF964, ZNF965, ZNF966, ZNF967, ZNF968, ZNF969, ZNF970, ZNF971, ZNF972, ZNF973, ZNF974, ZNF975, ZNF976, ZNF977, ZNF978, ZNF979, ZNF980, ZNF981, ZNF982, ZNF983, ZNF984, ZNF985, ZNF986, ZNF987, ZNF988, ZNF989, ZNF990, ZNF991, ZNF992, ZNF993, ZNF994, ZNF995, ZNF996, ZNF997, ZNF998, ZNF999, ZNF1000                                                                                                                                                                                                                                                                 |
| GOTERM   | GO:0000122 | Negative regulation of transcription from RNA polymerase II promoter | 2.96           | ZNF496, RARG, ZNF296, EPO, SUV39H1, NR2E1, NOC3L, BACH1, SOX2, MECP2, HMGB2A, ANKRD2, FEZF2, JUNB, ZNF565, BOMES, LMO1, KLF11, HES6, HAZ2, PARR1, DNMT3A, MAGEA1B, RUNX3, FOXO3, EDI, RBL1, BRMS1, IFNG, TEL1, RXR, RARA, TNBP, AURBA, HDAC4, FOXO3, DNMT1, NOTCH1, SATB1, ARX, GATA6, SP2, ASCL1, ASCL2, RELB, DNAB1, ZEB1, ZEB2, ZEB3, ZEB4, ZEB5, ZEB6, ZEB7, ZEB8, ZEB9, ZEB10, ZEB11, ZEB12, ZEB13, ZEB14, ZEB15, ZEB16, ZEB17, ZEB18, ZEB19, ZEB20, ZEB21, ZEB22, ZEB23, ZEB24, ZEB25, ZEB26, ZEB27, ZEB28, ZEB29, ZEB30, ZEB31, ZEB32, ZEB33, ZEB34, ZEB35, ZEB36, ZEB37, ZEB38, ZEB39, ZEB40, ZEB41, ZEB42, ZEB43, ZEB44, ZEB45, ZEB46, ZEB47, ZEB48, ZEB49, ZEB50, ZEB51, ZEB52, ZEB53, ZEB54, ZEB55, ZEB56, ZEB57, ZEB58, ZEB59, ZEB60, ZEB61, ZEB62, ZEB63, ZEB64, ZEB65, ZEB66, ZEB67, ZEB68, ZEB69, ZEB70, ZEB71, ZEB72, ZEB73, ZEB74, ZEB75, ZEB76, ZEB77, ZEB78, ZEB79, ZEB80, ZEB81, ZEB82, ZEB83, ZEB84, ZEB85, ZEB86, ZEB87, ZEB88, ZEB89, ZEB90, ZEB91, ZEB92, ZEB93, ZEB94, ZEB95, ZEB96, ZEB97, ZEB98, ZEB99, ZEB1000                                                                                                                                                                                                                                                                                                                                                                                                                                                                                                                                                                                                                                                                                                                                                                                                                                                                                                                                                                                                                                                                                                                                                                                                                                                                                                                                                                                                                                                                                                                                                                                                                                                                                                                                                                                                                                                                                                                                                                                                                                                                                                                                                                                                                                                                                                                                                                                                                                                                                                                                                                                                                                                                                                                                                                                                                                                                                                                                                                                                                                                                                                                                                                                                                                                                                                                                                                                                                                                                                                                                                                                                                                                                                                                                                                                                                                                                                                                                                                                                                                                                                                                                                                                                                                                                                                                                                                                                                                                                                                                                                                                                                                                                                                                                                                                                                                                                                                                                                                                                                                                                                                                                                                                                                                                                                                                                                                                                                                                                                                                                                                                                                                                                                                                                                                                                                                                                                                                                                                                                                                                                                                                                                                                                                                           |
| GOTERM   | GO:0003682 | Chromatin binding                                                    | 2.93           | HDAC4, CEBPB, DNMT1, SATB1, PARR1, SUV39H1, HP1B3, ARX, GATA6, NOC3L, ASCL1, ELK1, RELB, MECP2, MED1, CREB1, ANKRD2, FEZF2, BOMES, KDM6B, MED3, BCAS1, SMAD4, MED6, NPM, NOOAS, MED1, CBX1, ACTL6A, DNMT3A, PDX1, GFZ1H, MLI1, REC8, MEIS1, POLR3A, NFIA, TCS2, CENPK, GANC, TOP1, AURBA, RAN, ASPIA                                                                                                                                                                                                                                                                                                                                                                                                                                                                                                                                                                                                                                                                                                                                                                                                                                                                                                                                                                                                                                                                                                                                                                                                                                                                                                                                                                                                                                                                                                                                                                                                                                                                                                                                                                                                                                                                                                                                                                                                                                                                                                                                                                                                                                                                                                                                                                                                                                                                                                                                                                                                                                                                                                                                                                                                                                                                                                                                                                                                                                                                                                                                                                                                                                                                                                                                                                                                                                                                                                                                                                                                                                                                                                                                                                                                                                                                                                                                                                                                                                                                                                                                                                                                                                                                                                                                                                                                                                                                                                                                                                                                                                                                                                                                                                                                                                                                                                                                                                                                                                                                                                                                                                                                                                                                                                                                                                                                                                                                                                                                                                                                                                                                                                                                                                                                                                                                                                                                                                                                                                                                                                                                                                                                                                                                                                                                                                                                                                                                                                                                                                                                                                                                                                                                                                                                                                                                                                                                                                                 |
| GOTERM   | GO:0005515 | Protein binding                                                      | 2.67           | IP013, RNH1, RPL3, FRMPD4, PWWP2B, C2ORF88, ENO1, NOC3L, BACH1, ELK1, ZC3H12, LIME, COMT, NUB1, WDR52, PSM2, ZMIZ2, CREB1, PRKACA, PRSS3, JUNB, ZNF169, CDKSRAP3, STARD3, RFX1, ATG13, GTPBP4, SMD1, ENL2, UNC13D, SIGIRR, NISCH, EID1, FAMI33A, ACE2, EVSR1, RUFY4, CLDN3, CLDN7, TROP, RECK1, ASPIA, PER13, RENO1, NLX1, NAPI, GATA3, PDGFA, NCAF9, AKAP17A, MAGEA9, NYAP, SULT1A1, HPX, CYBB1, NOST1, PPP4C, PKAR2B, BOW2, ZEB1B, ZEB1C, ZEB1D, ZEB1E, ZEB1F, ZEB1G, ZEB1H, ZEB1I, ZEB1J, ZEB1K, ZEB1L, ZEB1M, ZEB1N, ZEB1O, ZEB1P, ZEB1Q, ZEB1R, ZEB1S, ZEB1T, ZEB1U, ZEB1V, ZEB1W, ZEB1X, ZEB1Y, ZEB1Z, ZEB200, ZEB201, ZEB202, ZEB203, ZEB204, ZEB205, ZEB206, ZEB207, ZEB208, ZEB209, ZEB210, ZEB211, ZEB212, ZEB213, ZEB214, ZEB215, ZEB216, ZEB217, ZEB218, ZEB219, ZEB220, ZEB221, ZEB222, ZEB223, ZEB224, ZEB225, ZEB226, ZEB227, ZEB228, ZEB229, ZEB230, ZEB231, ZEB232, ZEB233, ZEB234, ZEB235, ZEB236, ZEB237, ZEB238, ZEB239, ZEB240, ZEB241, ZEB242, ZEB243, ZEB244, ZEB245, ZEB246, ZEB247, ZEB248, ZEB249, ZEB250, ZEB251, ZEB252, ZEB253, ZEB254, ZEB255, ZEB256, ZEB257, ZEB258, ZEB259, ZEB260, ZEB261, ZEB262, ZEB263, ZEB264, ZEB265, ZEB266, ZEB267, ZEB268, ZEB269, ZEB270, ZEB271, ZEB272, ZEB273, ZEB274, ZEB275, ZEB276, ZEB277, ZEB278, ZEB279, ZEB280, ZEB281, ZEB282, ZEB283, ZEB284, ZEB285, ZEB286, ZEB287, ZEB288, ZEB289, ZEB290, ZEB291, ZEB292, ZEB293, ZEB294, ZEB295, ZEB296, ZEB297, ZEB298, ZEB299, ZEB300, ZEB301, ZEB302, ZEB303, ZEB304, ZEB305, ZEB306, ZEB307, ZEB308, ZEB309, ZEB310, ZEB311, ZEB312, ZEB313, ZEB314, ZEB315, ZEB316, ZEB317, ZEB318, ZEB319, ZEB320, ZEB321, ZEB322, ZEB323, ZEB324, ZEB325, ZEB326, ZEB327, ZEB328, ZEB329, ZEB330, ZEB331, ZEB332, ZEB333, ZEB334, ZEB335, ZEB336, ZEB337, ZEB338, ZEB339, ZEB340, ZEB341, ZEB342, ZEB343, ZEB344, ZEB345, ZEB346, ZEB347, ZEB348, ZEB349, ZEB350, ZEB351, ZEB352, ZEB353, ZEB354, ZEB355, ZEB356, ZEB357, ZEB358, ZEB359, ZEB360, ZEB361, ZEB362, ZEB363, ZEB364, ZEB365, ZEB366, ZEB367, ZEB368, ZEB369, ZEB370, ZEB371, ZEB372, ZEB373, ZEB374, ZEB375, ZEB376, ZEB377, ZEB378, ZEB379, ZEB380, ZEB381, ZEB382, ZEB383, ZEB384, ZEB385, ZEB386, ZEB387, ZEB388, ZEB389, ZEB390, ZEB391, ZEB392, ZEB393, ZEB394, ZEB395, ZEB396, ZEB397, ZEB398, ZEB399, ZEB400, ZEB401, ZEB402, ZEB403, ZEB404, ZEB405, ZEB406, ZEB407, ZEB408, ZEB409, ZEB410, ZEB411, ZEB412, ZEB413, ZEB414, ZEB415, ZEB416, ZEB417, ZEB418, ZEB419, ZEB420, ZEB421, ZEB422, ZEB423, ZEB424, ZEB425, ZEB426, ZEB427, ZEB428, ZEB429, ZEB430, ZEB431, ZEB432, ZEB433, ZEB434, ZEB435, ZEB436, ZEB437, ZEB438, ZEB439, ZEB440, ZEB441, ZEB442, ZEB443, ZEB444, ZEB445, ZEB446, ZEB447, ZEB448, ZEB449, ZEB450, ZEB451, ZEB452, ZEB453, ZEB454, ZEB455, ZEB456, ZEB457, ZEB458, ZEB459, ZEB460, ZEB461, ZEB462, ZEB463, ZEB464, ZEB465, ZEB466, ZEB467, ZEB468, ZEB469, ZEB470, ZEB471, ZEB472, ZEB473, ZEB474, ZEB475, ZEB476, ZEB477, ZEB478, ZEB479, ZEB480, ZEB481, ZEB482, ZEB483, ZEB484, ZEB485, ZEB486, ZEB487, ZEB488, ZEB489, ZEB490, ZEB491, ZEB492, ZEB493, ZEB494, ZEB495, ZEB496, ZEB497, ZEB498, ZEB499, ZEB500, ZEB501, ZEB502, ZEB503, ZEB504, ZEB505, ZEB506, ZEB507, ZEB508, ZEB509, ZEB510, ZEB511, ZEB512, ZEB513, ZEB514, ZEB515, ZEB516, ZEB517, ZEB518, ZEB519, ZEB520, ZEB521, ZEB522, ZEB523, ZEB524, ZEB525, ZEB526, ZEB527, ZEB528, ZEB529, ZEB530, ZEB531, ZEB532, ZEB533, ZEB534, ZEB535, ZEB536, ZEB537, ZEB538, ZEB539, ZEB540, ZEB541, ZEB542, ZEB543, ZEB544, ZEB545, ZEB546, ZEB547, ZEB548, ZEB549, ZEB550, ZEB551, ZEB552, ZEB553, ZEB554, ZEB555, ZEB556, ZEB557, ZEB558, ZEB559, ZEB560, ZEB561, ZEB562, ZEB563, ZEB564, ZEB565, ZEB566, ZEB567, ZEB568, ZEB569, ZEB570, ZEB571, ZEB572, ZEB573, ZEB574, ZEB575, ZEB576, ZEB577, ZEB578, ZEB579, ZEB580, ZEB581, ZEB582, ZEB583, ZEB584, ZEB585, ZEB586, ZEB587, ZEB588, ZEB589, ZEB590, ZEB591, ZEB592, ZEB593, ZEB594, ZEB595, ZEB596, ZEB597, ZEB598, ZEB599, ZEB600, ZEB601, ZEB602, ZEB603, ZEB604, ZEB605, ZEB606, ZEB607, ZEB608, ZEB609, ZEB610, ZEB611, ZEB612, ZEB613, ZEB614, ZEB615, ZEB616, ZEB617, ZEB618, ZEB619, ZEB620, ZEB621, ZEB622, ZEB623, ZEB624, ZEB625, ZEB626, ZEB627, ZEB628, ZEB629, ZEB630, ZEB631, ZEB632, ZEB633, ZEB634, ZEB635, ZEB636, ZEB637, ZEB638, ZEB639, ZEB640, ZEB641, ZEB642, ZEB643, ZEB644, ZEB645, ZEB646, ZEB647, ZEB648, ZEB649, ZEB650, ZEB651, ZEB652, ZEB653, ZEB654, ZEB655, ZEB656, ZEB657, ZEB658, ZEB659, ZEB660, ZEB661, ZEB662, ZEB663, ZEB664, ZEB665, ZEB666, ZEB667, ZEB668, ZEB669, ZEB670, ZEB671, ZEB672, ZEB673, ZEB674, ZEB675, ZEB676, ZEB677, ZEB678, ZEB679, ZEB680, ZEB681, ZEB682, ZEB683, ZEB684, ZEB685, ZEB686, ZEB687, ZEB688, ZEB689, ZEB690, ZEB691, ZEB692, ZEB693, ZEB694, ZEB695, ZEB696, ZEB697, ZEB698, ZEB699, ZEB700, ZEB701, ZEB702, ZEB703, ZEB704, ZEB705, ZEB706, ZEB707, ZEB708, ZEB709, ZEB710, ZEB711, ZEB712, ZEB713, ZEB714, ZEB715, ZEB716, ZEB717, ZEB718, ZEB719, ZEB720, ZEB721, ZEB722, ZEB723, ZEB724, ZEB725, ZEB726, ZEB727, ZEB728, ZEB729, ZEB730, ZEB731, ZEB732, ZEB733, ZEB734, ZEB735, ZEB736, ZEB737, ZEB738, ZEB739, ZEB740, ZEB741, ZEB742, ZEB743, ZEB744, ZEB745, ZEB746, ZEB747, ZEB748, ZEB749, ZEB750, ZEB751, ZEB752, ZEB753, ZEB754, ZEB755, ZEB756, ZEB757, ZEB758, ZEB759, ZEB760, ZEB761, ZEB762, ZEB763, ZEB764, ZEB765, ZEB766, ZEB767, ZEB768, ZEB769, ZEB770, ZEB771, ZEB772, ZEB773, ZEB774, ZEB775, ZEB776, ZEB777, ZEB778, ZEB779, ZEB780, ZEB781, ZEB782, ZEB783, ZEB784, ZEB785, ZEB786, ZEB787, ZEB788, ZEB789, ZEB790, ZEB791, ZEB792, ZEB793, ZEB794, ZEB795, ZEB796, ZEB797, ZEB798, ZEB799, ZEB800, ZEB801, ZEB802, ZEB803, ZEB804, ZEB805, ZEB806, ZEB807, ZEB808, ZEB809, ZEB810, ZEB811, ZEB812, ZEB813, ZEB814, ZEB815, ZEB816, ZEB817, ZEB818, ZEB819, ZEB820, ZEB821, ZEB822, ZEB823, ZEB824, ZEB825, ZEB826, ZEB827, ZEB828, ZEB829, ZEB830, ZEB831, ZEB832, ZEB833, ZEB834, ZEB835, ZEB836, ZEB837, ZEB838, ZEB839, ZEB840, ZEB841, ZEB842, ZEB843, ZEB844, ZEB845, ZEB846, ZEB847, ZEB848, ZEB849, ZEB850, ZEB851, ZEB852, ZEB853, ZEB854, ZEB855, ZEB856, ZEB857, ZEB858, ZEB859, ZEB860, ZEB861, ZEB862, ZEB863, ZEB864, ZEB865, ZEB866, ZEB867, ZEB868, ZEB869, ZEB870, ZEB871, ZEB872, ZEB873, ZEB874, ZEB875, ZEB876, ZEB877, ZEB878, ZEB879, ZEB880, ZEB881, ZEB882, ZEB883, ZEB884, ZEB885, ZEB886, ZEB887, ZEB888, ZEB889, ZEB890, ZEB891, ZEB892, ZEB893, ZEB894, ZEB895, ZEB896, ZEB897, ZEB898, ZEB899, ZEB900, ZEB901, ZEB902, ZEB903, ZEB904, ZEB905, ZEB906, ZEB907, ZEB908, ZEB909, ZEB910, ZEB911, ZEB912, ZEB913, ZEB914, ZEB915, ZEB916, ZEB917, ZEB918, ZEB919, ZEB920, ZEB921, ZEB922, ZEB923, ZEB924, ZEB925, ZEB926, ZEB927, ZEB928, ZEB929, ZEB930, ZEB931, ZEB932, ZEB933, ZEB934, ZEB935, ZEB936, ZEB937, ZEB938, ZEB939, ZEB940, ZEB941, ZEB942, ZEB943, ZEB944, ZEB945, ZEB946, ZEB947, ZEB948, ZEB949, ZEB950, ZEB951, ZEB952, ZEB953, ZEB954, ZEB955, ZEB956, ZEB957, ZEB958, ZEB959, ZEB960, ZEB961, ZEB962, ZEB963, ZEB964, ZEB965, ZEB966, ZEB967, ZEB968, ZEB969, ZEB970, ZEB971, ZEB972, ZEB973, ZEB974, ZEB975, ZEB976, ZEB977, ZEB978, ZEB979, ZEB980, ZEB981, ZEB982, ZEB983, ZEB984, ZEB985, ZEB986, ZEB987, ZEB988, ZEB989, ZEB990, ZEB991, ZEB992, ZEB993, ZEB994, ZEB995, ZEB996, ZEB997, ZEB998, ZEB999, ZEB1000 |
| GOTERM   | GO:0016020 | Membrane                                                             | 2.63           | ERG1, ITIH4, FMR1, ZAN, SLC23A1, TNC, ICAM2, SLC4A2, ENO1, COMT, ACTB, AHDH13, ST3, PSM2, CREB1, PLAGL1, NIPAL1, ARLGAP5, DAG1, SPAT1, PCLD4, PRKACA, IL6R, CDKSRAP3, KRTA5, SLC12A9, ACVRL1, MAGH, BROX1, MLL1, CDRAL1, GTPBP4, UNC13D, SMD1, TUPP, TPST2, SIGIRR, NISCH, ACY1, BACH3, POR, NCL, TSNARE1, PDGFA, ITPR2, NCA9P, PLA2G6, PLD1, GYGF2, FUT4, FUT3, CYBB1, NCSN1, SGN1, RCE1, ST3GAL1, CTSF, FTS1, OSBP1L, NOP14, TMEM58, NUP155, RCC2, SUCO, SLC4A11, EPNA1, AMP1, RPL7A, SLC5A5, INTS3, CNTN1, TUBGCP3, CALR, CLPTM1L, DHR9, FARSE, PEBP1, BCL2L1, CD320, ACVRL1, SNAI5, RPL10A, RPL10B, RPL10C, RPL10D, RPL10E, RPL10F, RPL10G, RPL10H, RPL10I, RPL10J, RPL10K, RPL10L, RPL10M, RPL10N, RPL10O, RPL10P, RPL10Q, RPL10R, RPL10S, RPL10T, RPL10U, RPL10V, RPL10W, RPL10X, RPL10Y, RPL10Z, RPL11, RPL12, RPL13, RPL14, RPL15, RPL16, RPL17, RPL18, RPL19, RPL20, RPL21, RPL22, RPL23, RPL24, RPL25, RPL26, RPL27, RPL28, RPL29, RPL30, RPL31, RPL32, RPL33, RPL34, RPL35, RPL36, RPL37, RPL38, RPL39, RPL40, RPL41, RPL42, RPL43, RPL44, RPL45, RPL46, RPL47, RPL48, RPL49, RPL50, RPL51, RPL52, RPL53, RPL54, RPL55, R                                                                                                                                                                                                                                                                                                                                                                                                                                                                                                                                                                                                                                                                                                                                                                                                                                                                                                                                                                                                                                                                                                                                                                                                                                                                                                                                                                                                                                                                                                                                                                                                                                                                                                                                                                                                                                                                                                                                                                                                                                                                                                                                                                                                                                                                                                                                                                                                                                                                                                                                                                                                                                                                                                                                                                                                                                                                                                                                                                                                                                                                                                                                                                                                                                                                                                                                                                                                                                                                                                                                                                                                                                                                                                                                                                                                                                                                                                                                                                                                                                                                                                                                                                                                                                                                                                                                                                                                                                                                                                                                                                                                                                                                                                                                                                                                                                                                                                                                                                                                                                                                                                                                                                                                                                                                                                                                                                                                                                                                                                                                                                                                                                                                                                                                                                                                                                                                                                                                                                                                                                                                                                                                                 |

**Supplementary Figure 3: Full-length blots for Figure 5B**

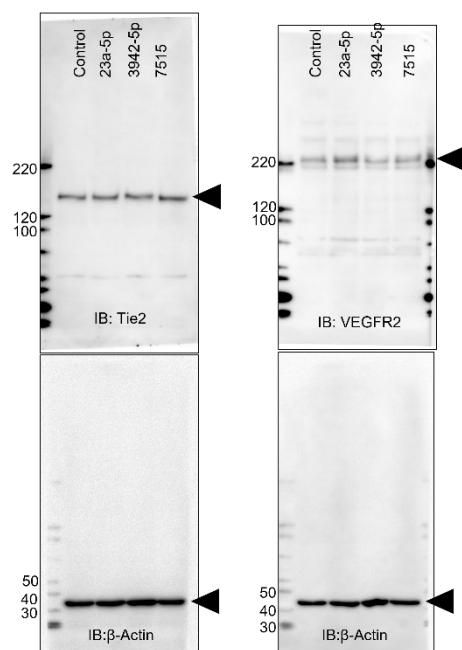

Supplement: 41598_2021_1450_MOESM1_ESM.pdf [file 41598_2021_1450_MOESM1_ESM.pdf]
